# Supplementary material for: MIX: a mosaic Asian anthropogenic emission inventory under the international collaboration framework of the MICS-Asia and HTAP
Source: Copernicus journal article supplement (doi:10.5194/acp-17-935-2017), 2017-01-20
Supplement: Supplementary file 1 [file acp-17-935-2017-supplement.zip]

**Tables and Figures included in the Supplementary**

**Tables:**

Table S1. Description of SAPRC-99 NMVOC emitting species from anthropogenic sources

Table S2. Description of CB05 NMVOC emitting species from anthropogenic sources

Table S3. Monthly profiles used for each component emission inventory in MIX

Table S4. Spatial proxies used for each component emission inventory in MIX

Table S5. Sector definition of MIX and source mapping matrix in the mosaic process

Table S6 – Table S14. Monthly emissions by sectors and Asian regions in 2010 (summarized in “acp-2015-947-MIX-monthlyemissions.xlsx”)

Table S15. New emission standards published/revised in China between 2006 and 2010

**Figures:**

Figure S1. Comparison of MIX, REAS2 and EDGAR v4.2 emission estimates for China in 2008 by species and by sector

**Table S1. Description of SAPRC-99 NMVOC emitting species from anthropogenic sourcesa**

| Species in SAPRC-99 | Description |
| --- | --- |
| ACET | Acetone |
| ALK1 | Primarily ethane |
| ALK2 | Primarily propane and acetylene |
| ALK3 | Alkanes and other non-aromatic compounds that react only with OH, and have kOH between 2.5 × 103 and 5 × 103 ppm-1 · min-1 |
| ALK4 | Alkanes and other non-aromatic compounds that react only with OH, and have kOH between 5 × 103 and 1 × 104 ppm-1 · min-1 |
| ALK5 | Alkanes and other non-aromatic compounds that react only with OH, and have kOH greater than 1 × 104 ppm-1 · min-1 |
| ARO1 | Aromatics with kOH < 2 × 104 ppm-1 · min-1 |
| ARO2 | Aromatics with kOH > 2 × 104 ppm-1 · min-1 |
| BACL | Biacetyl |
| BALD | Aromatic aldehydes (e.g., benzaldehyde) |
| CCHO | Methyl Hydroperoxide |
| CRES | Cresols |
| ETHE | Ethene |
| GLY | Glyoxal |
| HCHO | Formaldehyde |
| IPRD | Unsaturated aldehydes other than acrolein and methacrolein |
| MACR | Methacrolein |
| MEK | Ketones and other non-aldehyde oxygenated products which react with OH radicals slower than 5 × 10-12 cm3 molec-2·sec-1 |
| MEOH | Methanol |
| MGLY | Methyl Glyoxal |
| MVK | Methyl Vinyl Ketone |
| NROG | Unreactive organic chemicals |
| NVOL | Nonvolatile organic chemicals |
| OLE1 | Alkenes (other than ethene) with kOH < 7 × 104 ppm-1 · min-1 |
| OLE2 | Alkenes with kOH > 7 × 104 ppm-1 · min-1 |
| PHEN | Phenol |
| PRD2 | Ketones and other non-aldehyde oxygenated products which react with OH radicals faster than 5 × 10-12 cm3 molec-2·sec-1 |
| RCHO | Lumped C3+ Aldehydes |

aSource: Carter, 2000.

**Table S2. Description of CB05 NMVOC emitting species from anthropogenic sourcesa**

| Species in CB05 | Description |
| --- | --- |
| ALD2 | Acetaldehyde |
| ALDX | Propionaldehyde and higher aldehydes |
| ETH | Ethene |
| ETHA | Ethane |
| ETOH | Ethanol |
| FORM | Formaldehyde |
| IOLE | Internal olefin carbon bond (R-C=C-R) |
| MEOH | Methanol |
| NVOL | Nonvolatile organic chemicals |
| OLE | Terminal olefin carbon bond (R-C=C) |
| PAR | Paraffin carbon bond (C-C) |
| TOL | Toluene and other monoalkyl aromatics |
| UNR | Unreactive VOCs |
| XYL | Xylene and other polyalkyl aromatics |

aSource: <http://www.camx.com/files/cb05_final_report_120805.aspx>

**Table S3. Monthly profiles used in each component emission inventory**

| Inventories | Sub-sectors | Monthly profiles | Data source |
| --- | --- | --- | --- |
| REAS2 | power plants | monthly power generations | not specified |
|  | residential combustion | stove operations based on surface temperatures | not specified |
|  | residential non-combustion | n/a | n/a |
|  | industrial combustion | monthly production of industrial products and fossil fuels | not specified |
|  | industrial non-combustion | monthly production of industrial products and fossil fuels | not specified |
|  | on-road vehicles (cold-start) | monthly emission factors and removal efficiencies dependent on ambient temperatures | n/a |
|  | on-road vehicles (other sources) | n/a | n/a |
|  | off-road transportation | n/a | n/a |
|  | domestic shipping | n/a | n/a |
|  | agriculture (Japan) | JEI-DBa monthly emissions | JEI-DB |
|  | agriculture (other regions) | n/a | n/a |
|  | waste | n/a | n/a |
|  | human | n/a | n/a |
| MEIC | power | monthly power generations | NBSb (Liu et al., 2015) |
|  | industrial heating | industrial production / GDP | NBS |
|  | residential heating | stove operations based on surface temperatures | NBS |
|  | industrial boiler | industrial production / GDP | NBS |
|  | residential combustion | stove operations based on surface temperatures | NBS |
|  | iron and steel | industrial production / GDP | NBS |
|  | cement | industrial production / GDP | NBS |
|  | other industrial process | industrial production / GDP | NBS |
|  | on-road vehicles | monthly emission factors modeled by IVEc | IVE model |
|  | motorcycles | monthly emission factors modeled by IVEc | IVE model |
|  | off-road | n/a | n/a |
|  | solvent use - industry | industrial production / GDP | NBS |
|  | solvent use - residential | n/a | n/a |
|  | agriculture | monthly emission fractions based on PKU-NH3 inventory | process-based model (Huang et al., 2012) |
|  | waste | industrial GDP | NBS |
| PKU-NH3 | fertilizer | monthly emission factors developed considering the soil pH, temperature, etc. | not specified |
|  | livestock | monthly emission factors developed based on surface temperature | not specified |
|  | chemical industry | n/a | n/a |
|  | waste disposal | n/a | n/a |
|  | compost | n/a | n/a |
|  | traffic | n/a | n/a |
|  | human excrement | n/a | n/a |
| ANL-India | power generation | monthly power generations | RBId, CSOe |
|  | industry | industrial production index / GDP | RBI, CSO |
|  | residential | stove operations based on surface temperatures | not specified |
|  | transport | volume of passenger and freight transported by ship, railway, etc. | RBI, CSO |
| CAPSS | all subsectors | n/a | n/a |

a JEI-DB, Japan Auto-Oil Program (JATOP) Emission Inventory-Data Base

b NBS, National Bureau of Statistics, http://www.stats.gov.cn/tjsj/

c IVE model, International vehicle emission model

d RBI, Reserve Bank of India

e CSO, Central Statistical Organization

**Table S4. Spatial proxies used in each component emission inventory**

| Inventories | Sub-sectors | Spatial proxies | Data source |
| --- | --- | --- | --- |
| REAS2 | power plants (large ones) | plant locations | CARMAa |
|  | power plants (small ones) | total population | GPW v3b |
|  | residential combustion (fossil fuel) | total population | GPW v3 |
|  | residential combustion (biofuel) | rural population | GRUMP v1c, GPW v3 |
|  | residential non-combustion | total population | GPW v3 |
|  | industrial combustion | total population | GPW v3 |
|  | industrial non-combustion | total population | GPW v3 |
|  | on-road vehicles | road network | DCWd |
|  | off-road transportation | rural population | GRUMP v1, GPW v3 |
|  | domestic shipping | total population | GPW v3 |
|  | agriculture | total population | GPW v3 |
|  | waste | total population | GPW v3 |
|  | human | total population | GPW v3 |
| MEIC | power | plant locations | Google Earth (Liu et al., 2015) |
|  | industrial heating | industrial GDPe, urban populationf | NBSg, LandScanh, urban/rural extentsi |
|  | residential heating | urban population | NBS, LandScan, urban/rural extents |
|  | industrial boiler | industrial GDPe, urban populationf | NBS, LandScan, urban/rural extents |
|  | residential combustion (fossil fuel) | urban population | NBS, LandScan, urban/rural extents |
|  | residential combustion (biofuel) | rural population | NBS, LandScan, urban/rural extents |
|  | iron and steel | industrial GDPe, urban populationf | NBS, LandScan, urban/rural extents |
|  | cement | industrial GDPe, urban populationf | NBS, LandScan, urban/rural extents |
|  | other industrial process | industrial GDPe, urban populationf | NBS, LandScan, urban/rural extents |
|  | on-road vehicles | vehicle populatione, road networkf | China Digital Road-network Map (Zheng et al., 2014) |
|  | motorcycles | vehicle populatione, road networkf | China Digital Road-network Map (Zheng et al., 2014) |
|  | off-road (agriculture machinery) | machine powere, rural populationf | NBS, LandScan, urban/rural extents |
|  | off-road (construction) | total GDPe , urban populationf | NBS, LandScan, urban/rural extents |
|  | off-road (others) | total population | NBS, LandScan |
|  | solvent use - industry | industrial GDPe, urban populationf | NBS, LandScan, urban/rural extents |
|  | solvent use - residential | urban populatione , urban populationf | NBS, LandScan, urban/rural extents |
|  | agriculture (fertilizer) | fertilizer usee, rural populationf | NBS, LandScan, urban/rural extents |
|  | agriculture (livestock) | meat consumptione , rural populationf | NBS, LandScan, urban/rural extents |
|  | waste | total population | NBS, LandScan |
| PKU-NH3 | fertilizer | developed based on consumptions and gridded emission factors | not necessary |
|  | livestock (free-range, intensive) | rural population | not specified |
|  | livestock (grazing) | grassland land cover | not specified |
|  | chemical industry | equally distributed | not specified |
|  | waste disposal | rural population | not specified |
|  | compost | land cover class | not specified |
|  | traffic | equally distributed | not specified |
|  | human excrement | rural population | not specified |
| ANL-India | power generation | plant locations | Global Energy Observatory and Google Earth |
|  | industry | gridded emissions in EDGAR v4.1 | JRC/PBL, 2010 |
|  | residential (coal) | urban population | GRUMP, LandScan, HYDEj |
|  | residential (biofuel) | rural population | GRUMP, LandScan, HYDE |
|  | residential (other sources) | total population | LandScan, HYDE |
|  | transport (on-road) | road network | DCW |
|  | transport (off-road) | cropland cover | Global Cropland Dataset (Ramankutty and Foley, 1999) |
| CAPSS | electricity generating utility (EGU) combustion | plant locations | Continuous Emission Monitoring System (CEMS), Stack Emission Management System (SEMS) |
|  | combustion in other energy industries | plant locations | CEMS, SEMS |
|  | combustion in manufacturing industries | plant locations for point sources, population data / number of employees for area sources | not specified |
|  | non-industrial combustion plants | plant locations for point sources, population data / number of employees for area sources | not specified |
|  | production processes | plant locations for point sources, population data / number of employees for area sources | not specified |
|  | storage and distribution of fuels | plant locations for point sources, population data / number of employees for area sources | not specified |
|  | solvent use | population data / number of employees | not specified |
|  | road transport | traffic volume, spatial traffic allocation index | traffic volume survey |
|  | other mobile sources and machinery | railroad network, sailing routes, urban / agricultural areas, construction areas | not specified |
|  | waste treatment and disposal | plant locations | not specified |
|  | agriculture | population data | not specified |

a CARMA, Carbon Monitoring for Action database (Wheeler and Ummel, 2008)

b GPWv3, Gridded Population on the World (CIESIN et al., 2005, 2011)

c GRUMP v1, Global Rural-Urban Mapping Project (CIESIN et al., 2005, 2011)

d DCW, Digital Chart of the World (DMA, 1993)

e proxies used to distribute provincial emissions to county

f proxies used to distribute county-level emissions to grids

g National Bureau of Statistics, http://www.stats.gov.cn/tjsj/

h LandScan Global Population database (ORNL, 2006, 2009)

i urban / rural extents developed by Schneider et al. (2009)

j HYDE, History Database of the Global Environment (Goldewijk et al., 2011)

**Table S5. Sector mapping from regional emission inventories to MIX**

| Inventories | Sub-sectors | MIX-sectors | IPCC codes |
| --- | --- | --- | --- |
| REAS2 | power plants | power | 1A1a |
|  | residential combustion | residential | 1A4 |
|  | residential non-combustion | residential | 3 |
|  | industrial combustion | industry | 1A1bc, 1A2 |
|  | industrial non-combustion | industry | 2A, 2B, 2C, 2D, 3, 1B |
|  | on-road vehicles | transportation | 1A3b |
|  | off-road transportation | transportation | 1A3c, 1A3e |
|  | domestic shipping | transportation | 1A3d |
|  | agriculture | agriculture | 4B, 4D |
|  | waste | residential | 6A, 6B |
|  | human | residential | n/a |
| MEIC | power | power | 1A1a |
|  | industrial heating | industry | 1A1bc |
|  | residential heating | residential | 1A1bc |
|  | industrial boiler | industry | 1A2 |
|  | residential combustion | residential | 1A4 |
|  | iron and steel | industry | 1A2, 2C |
|  | cement | industry | 1A2, 2A |
|  | other industrial process | industry | 2A, 2B, 2C, 2D, 1B |
|  | on-road vehicles | transportation | 1A3b |
|  | motorcycles | transportation | 1A3b |
|  | off-road | transportation | 1A3c, 1A3d, 1A3e |
|  | solvent use - industry | industry | 3 |
|  | solvent use - residential | residential | 3 |
|  | agriculture | agriculture | 4B, 4D |
|  | waste | residential | 6A, 6C |
| PKU-NH3 | fertilizer | agriculture | 4D |
|  | livestock | agriculture | 4B |
|  | biomass burning | n/a |  |
|  | chemical industry | industry | 2B |
|  | waste disposal | residential | 6A, 6B, 6C |
|  | agricultural soil | n/a |  |
|  | N-Fixing crop | n/a |  |
|  | compost | agriculture | 6D |
|  | traffic | transportation | 1A3b |
|  | human excrement | residential | n/a |
| ANL-India | power generation | power | 1A1a |
|  | industry | industry | 1A1bc, 1A2, 2A, 2B, 2C, 2D, 3, 1B |
|  | residential | residential | 1A4, 6A, 6B, 6C |
|  | transport | transportation | 1A3b, 1A3c, 1A3d, 1A3e |
|  | forest & savanna burning | n/a |  |
|  | agriculture waste burning | n/a |  |
| CAPSS | electricity generating utility (EGU) combustion | power | 1A1a |
|  | combustion in other energy industries | industry | 1A1bc |
|  | combustion in manufacturing industries | industry | 1A2 |
|  | non-industrial combustion plants | residential | 1A4 |
|  | production processes | industry | 2A, 2B, 2C, 2D |
|  | storage and distribution of fuels | industry | 1B |
|  | solvent use | industry / residential | 3 |
|  | road transport | transportation | 1A3b |
|  | other mobile sources and machinery | transportation | 1A3c, 1A3d, 1A3e |
|  | waste treatment and disposal | residential | 6A, 6C |
|  | agriculture | agriculture | 4B, 4D |
|  | fugitive dust | n/a |  |

**Table S6 – Table S14: Monthly emissions by sector by Asian regions. They are summarized in the “acp-2015-947-MIX-monthlyemissions.xlsx”.**

**Table S15. New emission standards published/revised in China between 2006 and 2010a**

| Sources | Standard code | Year of implementation |
| --- | --- | --- |
| *Stationary sources* | | |
| Coal industry | GB20426-2006 | 2006 |
| Bulk gasoline terminals | GB20950-2007 | 2007 |
| Gasoline filling stations | GB20952-2007 | 2007 |
| Electroplating | GB21900-2008 | 2008 |
| Synthetic leather and artificial leather industry | GB21902-2008 | 2008 |
| Ceramics industry | GB25464-2010 | 2010 |
| Aluminum industry | GB25465-2010 | 2010 |
| Lead and zinc industry | GB25466-2010 | 2010 |
| Copper, nickel, cobalt industry | GB25467-2010 | 2010 |
| Magnesium and titanium industry | GB25468-2010 | 2010 |
| *Mobile sources* | | |
| Tri-wheelers and low speed diesel trucks | GB19756-2005 | 2006 |
| Diesel vehicles | GB17691-2005 | 2007 |
| Light duty gasoline vehicles | GB18352.3-2005 | 2007 |
| Off-road machinery | GB20891-2007 | 2007 |
| Motorcycles | GB14622-2007 | 2008 |
| Gasoline transportation | GB20951-2007 | 2007 |
| Motorcycles (evaporative) | GB20998-2007 | 2008 |
| Heavy duty gasoline vehicles | GB14762-2008 | 2009 |

aMinistry of Environmental Protection of the People’s Republic of China, available at: http://kjs.mep.gov.cn/hjbhbz/bzwb/dqhjbh/


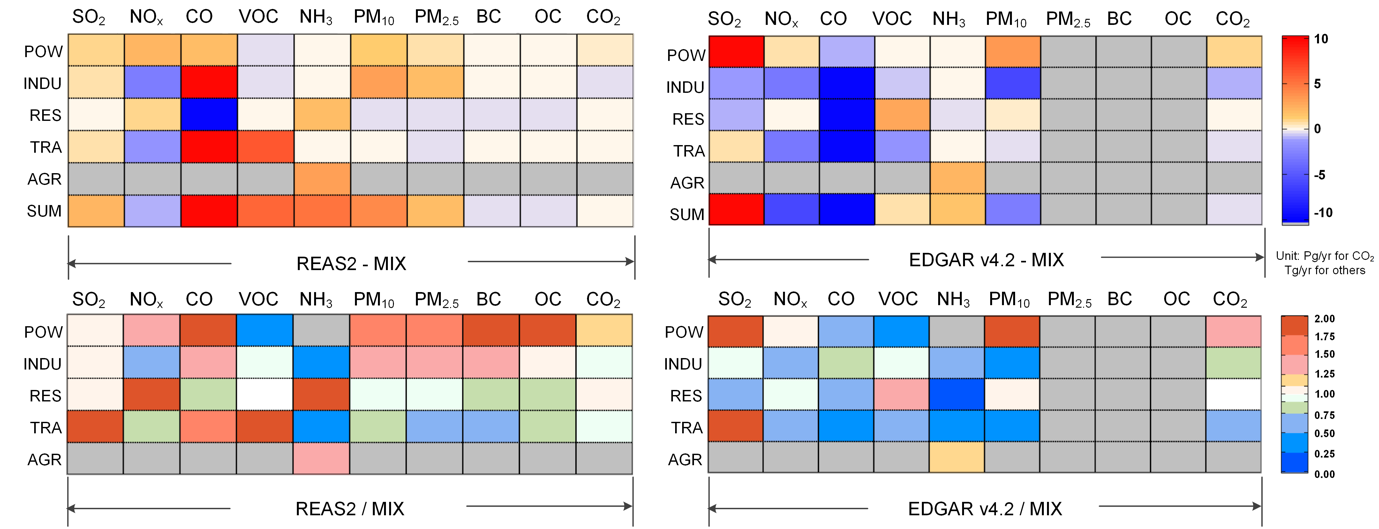


**Figure S1. Comparison of MIX, REAS2 and EDGAR v4.2 emission estimates for China in 2008 by species and by sector**

**References**

Carter, W. P. L.: Documentation of the SAPRC-99 chemical mecha- nism for VOC reactivity assessment, report to the California Air Resources Board, available at: http://www.engr.ucr.edu/~carter/ reactdat.htm (last access: October 2013), 2000.

CIESIN (Center for International Earth Science Information Net- work), Columbia University, United Nations Food and Agricul- ture Programme (FAO), and Centro Internacional de Agricul- tura Tropical (CIAT): Gridded Population of the World, Ver- sion 3 (GPWv3), Population Count Grid, Future Estimates, Pal- isades, NY, NASA Socioeconomic Data and Applications Cen- ter (SEDAC), available at: http://sedac.ciesin.columbia.edu/data/ set/gpw- v3- population- count- future- estimates (last access: 10 November 2013), 2005.

CIESIN (Center for International Earth Science Information Net- work), Columbia University, International Food Policy Research Institute (IFPRI), The World Bank, and Centro Internacional de Agricultura Tropical (CIAT): Global Rural-Urban Mapping Project, Version 1 (GRUMPv1), Population Count Grid, Pal- isades, NY, NASA Socioeconomic Data and Applications Center (SEDAC), available at: http://sedac.ciesin.columbia.edu/data/set/ grump- v1- population- count (last access: 10 November 2013), 2011.

Defense Mapping Agency (DMA): Digital Chart of the World Database, Washington DC, USA, 1993.

Goldewijk, K. K., Beusen, A., van Drecht, G., and de Vos, M.: The HYDE 3.1 spatially explicit database of human-induced global land-use change over the past 12,000 years, Global Ecol. Biogeogr., 20, 73–86, 2011.

Huang, X., Song, Y., Li, M., Li, J., Huo, Q., Cai, X., Zhu, T., Hu, M., and Zhang, H.: A high-resolution ammonia emission inventory in China, Global Biogeochem. Cy., 26, GB1030, doi:10.1029/2011GB004161, 2012.

Joint Research Centre (JRC)/Netherlands Environmental Assessment Agency (PBL): Emission Database for Global Atmospheric Research (EDGAR), release version 4.1, available online at: http://edgar.jrc.ec.europa.eu, 2010.

Liu, F., Zhang, Q., Tong, D., Zheng, B., Li, M., Huo, H., and He, K. B.: High-resolution inventory of technologies, activities, and emissions of coal-fired power plants in China from 1990 to 2010, Atmos. Chem. Phys., 15, 13299-13317, doi:10.5194/acp-15-13299-2015, 2015.

Oak Ridge National Laboratory (ORNL): LandScan Global Population Database, Oak Ridge National Laboratory, Oak Ridge, Tenn., USA, 2006, 2009.

Ramankutty, N. and Foley, J. A.: Estimating historical changes in global land cover: Croplands from 1700 to 1992, Global Biogeochem. Cy., 13, 997–1027, 1999.

Schneider, A., Friedl, M. A., and Potere, D.: A new map of global urban extent from MODIS satellite data, Environ. Res. Lett., 4, 044003, 2009.

Wheeler, D. and Ummel, K.: Calculating CARMA: Global estimation of CO2 emissions from the power sector, Center for Global Development, Working Paper 145, 2008.

Zheng, B., Huo, H., Zhang, Q., Yao, Z. L., Wang, X. T., Yang, X. F., Liu, H., and He, K. B.: High-resolution mapping of vehicle emissions in China in 2008, Atmos. Chem. Phys., 14, 9787-9805, doi:10.5194/acp-14-9787-2014, 2014.
