# Supplementary material for: MIX: a mosaic Asian anthropogenic emission inventory under the international collaboration framework of the MICS-Asia and HTAP
Source: Copernicus journal article supplement (doi:10.5194/acp-17-935-2017), 2017-01-20
Supplement: Supplementary file 1 [file acp-17-935-2017-supplement.zip]

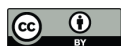

## *Supplement of*

# **MIX: a mosaic Asian anthropogenic emission inventory under the international collaboration framework of the MICS-Asia and HTAP**

**Meng Li et al.**

*Correspondence to:* Qiang Zhang ([qiangzhang@tsinghua.edu.cn](mailto:qiangzhang@tsinghua.edu.cn))

- [acp-17-935-2017-supplement-title-page.pdf](#)
- [acp-2015-947-MIX-monthlyemissions.xlsx](#)
- [acp-2015-947-MIX-supplement.docx](#)

The copyright of individual parts of the supplement might differ from the CC-BY 3.0 licence.
