# Supplementary material for: MIX: a mosaic Asian anthropogenic emission inventory under the international collaboration framework of the MICS-Asia and HTAP
Source: Copernicus journal article supplement (doi:10.5194/acp-17-935-2017), 2017-01-20
Supplement: Supplementary file 2 [file acp-2015-947-MIX-monthlyemissions.xlsx]

## Sheet: TableS6
Table S7. Monthly emissions by Asian region in 2010 (Units: Tg/month for CO2 and Gg/month for other species).
Asia	Jan	Feb	Mar	Apri	May	Jun	Jul	Aug	Sep	Oct	Nov	Dec
SO2	4577.97	3931.45	4464.5	4095.98	4147.1	4181.31	4176.97	4112.58	4081.55	4172.08	4484.61	4897.82
NOx	4448.53	3941.43	4428.79	4243.1	4289.76	4298.94	4355.4	4340.48	4246.72	4310.3	4486.63	4727.43
CO	36391.5	30496.1	30295.6	25531	25467.9	24803.4	25002	24976.1	24565.1	25967.4	29079	34013.1
NMVOC	6063.29	5294.73	5705.29	5302.12	5425.77	5423.28	5494.11	5432.28	5395.56	5534.72	5728.73	6234.29
NH3	2199.6	2038.54	2233.73	2382.99	2559.58	2649.71	2663.28	2758.96	2420.68	2307.96	2312.33	2288.59
PM10	3057.75	2598.39	2757.63	2480.07	2513.95	2504.56	2503.71	2485.24	2449.15	2548.56	2742.33	3084.99
PM2.5	2295.5	1932.53	1990.7	1751.51	1769.93	1757.44	1761.44	1752.44	1726.89	1795.81	1964.5	2250.78
BC	387.18	326.803	314.363	263.178	262.588	261.562	262.282	260.668	260.274	268.781	303.453	359.058
OC	974.953	807.779	746.384	605.931	603.766	593.889	602.157	601.136	592.557	618.037	709.005	866.833
CO2	1532.23	1311.42	1479.7	1383.52	1401.85	1414.93	1427.72	1414.96	1384.2	1419.39	1501.21	1629.55
China	Jan	Feb	Mar	Apri	May	Jun	Jul	Aug	Sep	Oct	Nov	Dec
SO2	2637.67	2143.7	2503.88	2225.33	2235.33	2335.56	2299.71	2244.23	2241.56	2262.1	2603.21	2930.88
NOx	2460.39	2117.74	2458.49	2347.01	2360.33	2422.2	2431.75	2419.01	2367	2367.7	2577.91	2741.24
CO	21427.9	605.578	645.715	835.712	941.021	1055.32	1005.3	1105.71	840.386	701.456	763.414	694.307
NMVOC	2291.58	1911.39	2013.42	1751.09	1779.71	1895.42	1851.91	1791.29	1857.35	1867.29	2140.77	2467.74
NH3	610.144	605.578	645.715	835.712	941.021	1055.32	1005.3	1105.71	840.386	701.456	763.414	694.307
PM10	1793.84	1424.21	1465.33	1214.2	1223.85	1257.48	1235.34	1219.1	1221.51	1256.7	1505.22	1798.27
PM2.5	1415.9	1113.54	1094.36	868.769	870.061	886.234	873.904	865.291	862.822	895.036	1099.23	1354.56
BC	232.142	180.565	163.693	118.653	117.36	119.094	118.053	116.215	116.657	122.119	156.127	204.019
OC	543.455	404.077	330.418	201.463	194.282	191.774	193.916	192.628	189.345	207.099	299.991	437.247
CO2	913.273	744.095	862.253	789.619	799.284	829.763	829.267	820.444	807.742	810.009	910.84	1007.57
Other East Asia	Jan	Feb	Mar	Apri	May	Jun	Jul	Aug	Sep	Oct	Nov	Dec
SO2	119.777	113.879	120.308	118.58	119.056	118.603	122.484	120.742	119.998	122.538	119.185	121.416
NOx	291.642	277.147	292.965	270.877	264.752	259.638	261.691	259.289	260.93	272.349	274.129	289.401
CO	1005.18	42.9153	51.7817	56.0463	76.7449	100.242	115.947	109.152	90.7502	70.0044	59.0781	53.0859
NMVOC	185.429	178.138	187.544	184.128	180.544	178.866	186.298	185.092	184.823	185.051	187.007	191.614
NH3	49.7384	42.9153	51.7817	56.0463	76.7449	100.242	115.947	109.152	90.7502	70.0044	59.0781	53.0859
PM10	52.4787	48.8258	52.7077	50.2429	50.441	49.6251	50.8508	50.6554	49.7207	51.573	50.931	52.3693
PM2.5	28.4727	26.7246	28.6197	27.0077	26.7701	26.4782	27.0488	26.9305	26.5568	27.6469	27.5679	28.3366
BC	5.32117	5.06546	5.37918	4.929	4.79875	4.80998	4.86224	4.86319	4.8044	4.99541	5.01496	5.16564
OC	3.44112	3.20222	3.41567	3.09264	2.90056	2.84869	2.90449	2.89532	2.86575	3.13189	3.28816	3.39542
CO2	148.113	141.139	146.79	143.019	142.316	141.875	145.98	143.531	142.821	146.555	143.836	148.981
India	Jan	Feb	Mar	Apri	May	Jun	Jul	Aug	Sep	Oct	Nov	Dec
SO2	799.275	752.821	821.543	769.189	780.92	746.989	742.405	735.662	740.003	773.56	774.72	822.073
NOx	816.561	752.069	807.662	787.633	806.607	787.257	805.406	805.207	786.276	806.444	788.542	815.074
CO	5872	757.618	838.12	810.975	837.876	810.863	837.775	837.751	810.807	838.074	811.205	839.651
NMVOC	1465.33	1306.49	1432.56	1381.81	1426.23	1380.17	1424.57	1423.38	1377.14	1428.49	1388.29	1457.84
NH3	839.861	757.618	838.12	810.975	837.876	810.863	837.775	837.751	810.807	838.074	811.205	839.651
PM10	613.427	572.908	616.264	592.566	600.038	580.617	583.605	580.193	560.195	602.337	577.213	613.843
PM2.5	451.287	420.579	447.909	432.98	439.389	427.062	431.5	429.971	418.419	440.556	426.115	450.054
BC	86.9463	85.5491	86.0171	83.6443	84.1218	83.7965	84.0473	84.0919	84.2912	84.2267	84.6145	87.4156
OC	216.788	213.452	211.382	208.663	209.192	208.7	209.075	209.106	209.16	209.351	209.683	215.47
CO2	197.02	180.167	200.262	191.46	194.713	186.458	187.475	186.025	176.964	195.389	183.952	197.335
Other South Asia	Jan	Feb	Mar	Apri	May	Jun	Jul	Aug	Sep	Oct	Nov	Dec
SO2	146.17	131.341	144.478	139.648	144.253	139.612	144.243	144.245	139.629	144.298	139.982	146.116
NOx	151.946	134.285	144.323	138.895	143.204	138.453	143.028	143.024	138.6	143.552	140.987	151.713
CO	1544.36	264.376	291.409	281.818	291.149	281.757	291.143	291.143	281.759	291.219	282.272	293.818
NMVOC	361.167	311.8	327.268	313.402	322.639	311.868	322.125	322.194	312.37	324.253	321.137	359.375
NH3	293.99	264.376	291.409	281.818	291.149	281.757	291.143	291.143	281.759	291.219	282.272	293.818
PM10	119.742	103.099	107.768	103.37	106.41	102.957	106.268	106.255	102.943	106.783	105.618	118.985
PM2.5	101.788	87.013	90.1437	86.3428	88.8359	85.9511	88.718	88.7094	85.9559	89.1989	88.5626	101.063
BC	19.3787	16.4078	16.567	15.8017	16.2189	15.6915	16.1949	16.1953	15.718	16.3277	16.4824	19.2668
OC	67.276	56.8194	57.9362	55.3776	56.9521	55.129	56.9034	56.9033	55.1518	57.2073	57.1366	66.681
CO2	38.0188	33.1805	35.3207	33.9681	35.0275	33.8887	34.9895	34.9837	33.8653	35.0965	34.4315	37.8861
Southeast Asia	Jan	Feb	Mar	Apri	May	Jun	Jul	Aug	Sep	Oct	Nov	Dec
SO2	376.829	340.472	377.202	365.884	376.387	366.076	379.13	378.509	366.06	377.856	366.427	378.495
NOx	433.836	391.626	434.616	421.343	433.664	421.014	435.758	435.428	420.981	434.834	421.334	435.346
CO	4339.91	352.238	389.916	377.636	390.215	377.442	390.474	390.079	377.469	389.888	377.295	389.905
NMVOC	1417.17	1277.99	1411.4	1364.04	1409.57	1366.08	1412.61	1412.53	1367.66	1413.85	1370.06	1416.86
NH3	389.85	352.238	389.916	377.636	390.215	377.442	390.474	390.079	377.469	389.888	377.295	389.905
PM10	257.026	229.379	258.339	253.227	258.935	252.37	260.132	259.637	249.599	259.571	249.972	262.506
PM2.5	192.255	171.971	192.969	188.799	193.511	188.236	194.013	193.796	186.404	193.744	186.69	195.649
BC	32.126	28.9533	32.1097	31.1157	32.1164	31.1114	32.1372	32.1264	31.0733	32.1282	31.0785	32.2055
OC	123.203	110.998	123.199	119.456	123.249	119.422	123.344	123.295	119.206	123.3	119.226	123.612
CO2	129.053	116.125	129.522	125.944	129.196	125.736	130.135	129.93	125.46	129.731	125.575	130.197
Central Asia	Jan	Feb	Mar	Apri	May	Jun	Jul	Aug	Sep	Oct	Nov	Dec
SO2	141.296	127.711	140.775	134.899	138.882	134.458	138.835	138.841	134.499	139.514	136.498	141.379
NOx	86.3881	78.2955	83.3693	78.5114	80.3089	77.4253	79.9175	79.925	77.7776	81.2734	81.1772	86.499
CO	592.569	10.1795	11.2645	10.9237	11.2863	10.9194	11.2371	11.3957	10.8707	11.2357	10.8842	11.2645
NMVOC	105.603	95.6872	101.706	94.2275	95.0507	90.4852	93.3809	93.4204	92.1021	97.7092	97.5612	105.007
NH3	11.259	10.1795	11.2645	10.9237	11.2863	10.9194	11.2371	11.3957	10.8707	11.2357	10.8842	11.2645
PM10	81.5593	73.9928	82.0185	79.3156	81.6008	79.1313	81.2044	81.4474	79.3967	81.8413	80.3651	81.4554
PM2.5	38.9072	35.3831	39.1118	37.6871	38.6178	37.4525	38.2954	38.4675	37.6747	38.8647	38.5201	38.8109
BC	2.28496	2.08335	2.00712	1.65533	1.54717	1.42079	1.45588	1.45695	1.50129	1.72676	1.87722	2.23898
OC	4.13209	3.77823	4.05093	3.76499	3.76141	3.62936	3.6692	3.7054	3.70924	3.89675	4.03701	4.1037
CO2	34.8826	31.6926	33.0071	30.9124	31.7117	30.7	31.6683	31.6733	30.7265	31.9999	32.6098	35.1109
Russia Asia	Jan	Feb	Mar	Apri	May	Jun	Jul	Aug	Sep	Oct	Nov	Dec
SO2	354.221	320.31	354.84	342.688	352.982	340.928	352.159	352.34	341.514	353.893	343.54	354.696
NOx	208.864	188.935	209.085	198.858	200.955	191.792	197.48	198.185	194.185	204.741	202.245	209.203
CO	1545.35	8.08141	8.94134	8.60687	8.91579	8.51241	9.03786	8.79443	8.52992	8.89363	8.65457	8.94052
NMVOC	230.868	208.604	230.229	215.436	215.124	202.399	206.42	207.89	206.499	220.501	222.14	230.932
NH3	8.9388	8.08141	8.94134	8.60687	8.91579	8.51241	9.03786	8.79443	8.52992	8.89363	8.65457	8.94052
PM10	176.381	162.228	181.437	174.918	179.23	169.198	173.705	175.401	173.098	178.522	178.061	181.246
PM2.5	99.8713	92.2915	103.455	99.2385	100.895	94.252	96.4837	97.7955	97.3557	100.825	101.863	103.36
BC	8.69066	7.85283	8.61409	7.51663	6.56766	5.623	5.58342	5.79944	6.28857	7.44472	8.26335	8.68967
OC	15.1983	14.0299	15.6834	14.5623	14.1341	12.8083	13.002	13.2877	13.5967	14.6889	15.4064	15.7065
CO2	71.1849	64.7337	71.9272	68.6662	69.7375	66.6749	68.7597	68.975	67.3684	70.8308	69.7941	71.7551

## Sheet: TableS7
Table S8. Monthly emissions by sector in Asia in 2010 (Units: Tg/month for CO2 and Gg/month for other species).
Species	Sectors	Jan	Feb	Mar	Apri	May	Jun	Jul	Aug	Sep	Oct	Nov	Dec
SO2	Pow	1721.37	1488.46	1724.22	1651.77	1652.46	1564.58	1590.57	1610.36	1520.58	1583.27	1635.23	1744.15
	Ind	1936.64	1742.44	2111.58	2029.99	2091.93	2224.15	2183.46	2098.58	2166.66	2164.4	2283.7	2395.29
	Resi	812.632	600.193	520.945	308.935	295.245	287.637	295.602	296.257	288.886	316.816	460.194	650.613
	Tran	107.33	100.354	107.755	105.286	107.472	104.94	107.34	107.383	105.418	107.597	105.492	107.769
	Total	4577.97	3931.45	4464.5	4095.98	4147.1	4181.31	4176.97	4112.58	4081.55	4172.08	4484.61	4897.82
NOx	Pow	1332.78	1131.85	1321.12	1277.15	1267.44	1232.95	1289.85	1323.16	1217.1	1224.43	1280.86	1360.88
	Ind	1044.02	909.003	1140.59	1120.93	1162.69	1249.5	1215.34	1166.15	1209.15	1207.45	1298.24	1341.63
	Resi	415.83	342.76	319.43	249.298	246.146	238.167	246.493	247.747	240.327	257.084	302.327	372.106
	Tran	1655.91	1557.81	1647.66	1595.72	1613.47	1578.32	1603.72	1603.43	1580.15	1621.33	1605.2	1652.81
	Total	4448.53	3941.43	4428.79	4243.1	4289.76	4298.94	4355.4	4340.48	4246.72	4310.3	4486.63	4727.43
CO	Pow	520.366	459.112	531.573	506.049	506.076	484.134	493.905	496.637	454.583	499.177	489.642	530.623
	Ind	8029.44	7341.61	8638.56	8639.39	8890.69	8918.05	8697.81	8630.03	8524.06	8656.95	8772.32	8955.87
	Resi	20799.6	16213.2	14385.6	10235.7	10105.5	9768.05	10090	10089.4	9775.62	10568.4	13287.1	17563.2
	Tran	7042.08	6482.13	6739.89	6149.83	5965.66	5633.15	5720.32	5759.95	5810.89	6242.88	6529.88	6963.4
	Total	36391.5	30496.1	30295.6	25531	25467.9	24803.4	25002	24976.1	24565.1	25967.4	29079	34013.1
NMVOC	Pow	47.096	40.6153	47.509	45.6661	45.5715	44.1078	45.6402	46.2189	42.4312	44.8641	44.9778	48.3125
	Ind	1898.95	1699.45	2055.4	2043.34	2121.53	2224.88	2199.14	2134.47	2189.11	2180.07	2221.22	2299.3
	Resi	2506.53	2085.17	2017.05	1694.84	1713.08	1659.04	1711.43	1711.29	1659.69	1748.1	1920.03	2280.56
	Tran	1610.72	1469.5	1585.33	1518.26	1545.59	1495.24	1537.9	1540.3	1504.32	1561.69	1542.5	1606.11
	Total	6063.29	5294.73	5705.29	5302.12	5425.77	5423.28	5494.11	5432.28	5395.56	5534.72	5728.73	6234.29
NH3	Pow	2.34796	2.14348	2.38084	2.29966	2.35069	2.26443	2.31373	2.30127	2.19657	2.36656	2.24989	2.37255
	Ind	52.9652	49.9308	53.0425	52.0244	53.0089	51.973	52.9368	52.8967	51.9402	52.9834	51.9542	52.9887
	Resi	405.859	367.84	401.759	390.512	404.65	396.696	410.353	409.411	395.363	404.113	391.888	405.707
	Tran	10.6667	10.2803	10.6715	10.4698	10.5956	10.4719	10.602	10.603	10.4677	10.5998	10.4677	10.603
	Agri	1727.76	1608.34	1765.88	1927.68	2088.98	2188.3	2187.08	2283.75	1960.71	1837.9	1855.77	1816.92
	Total	2199.6	2038.54	2233.73	2382.99	2559.58	2649.71	2663.28	2758.96	2420.68	2307.96	2312.33	2288.59
PM10	Pow	364.111	321.466	372.983	354.694	353.485	338.24	343.787	345.185	316.262	350.122	342.555	372.173
	Ind	1155.83	1030.21	1253.53	1252.05	1295.57	1323.69	1297.23	1276.95	1288.73	1304.57	1339.97	1381.56
	Resi	1379.3	1100.76	976.543	725.009	716.075	698.297	715.628	715.622	698.498	742.694	908.992	1173.53
	Tran	158.511	145.962	154.574	148.308	148.819	144.325	147.069	147.485	145.657	151.17	150.813	157.727
	Total	3057.75	2598.39	2757.63	2480.07	2513.95	2504.56	2503.71	2485.24	2449.15	2548.56	2742.33	3084.99
PM2.5	Pow	173.793	150.822	177.108	168.482	167.187	160.272	163.875	165.555	150.59	164.519	163.698	178.136
	Ind	716.309	640.353	777.173	777.02	803.593	818.782	800.6	789.524	796.446	806.259	828.657	853.96
	Resi	1253.28	1001.26	888.198	663.748	656.439	640.033	656.016	656.001	640.201	680.069	827.435	1067.31
	Tran	152.119	140.091	148.225	142.264	142.706	138.353	140.953	141.357	139.654	144.966	144.714	151.378
	Total	2295.5	1932.53	1990.7	1751.51	1769.93	1757.44	1761.44	1752.44	1726.89	1795.81	1964.5	2250.78
BC	Pow	0.622764	0.546426	0.62311	0.600808	0.60902	0.587782	0.607324	0.611624	0.582187	0.600963	0.600351	0.631353
	Ind	67.6785	62.6607	73.7221	72.0029	74.4114	77.2778	75.1801	73.3104	75.2151	74.759	77.0294	81.0502
	Resi	268.038	214.685	190.147	142.69	140.726	138.05	140.679	140.681	138.077	145.353	176.708	226.732
	Tran	50.8405	48.9117	49.8701	47.8844	46.8413	45.6471	45.8149	46.0646	46.4001	48.0682	49.1159	50.6443
	Total	387.18	326.803	314.363	263.178	262.588	261.562	262.282	260.668	260.274	268.781	303.453	359.058
OC	Pow	1.07023	0.971073	1.07542	1.03727	1.06666	1.02446	1.04718	1.04332	1.01738	1.06211	1.03349	1.07449
	Ind	94.5331	87.1918	100.236	98.1667	101.331	101.824	100.675	99.4987	99.8688	100.636	101.69	105.991
	Resi	850.673	692.52	617.101	480.154	475.406	466.029	475.221	475.218	466.122	489.556	578.826	731.17
	Tran	28.6768	27.096	27.9713	26.5733	25.9623	25.0106	25.2144	25.3767	25.5486	26.7817	27.4558	28.597
	Total	974.953	807.779	746.384	605.931	603.766	593.889	602.157	601.136	592.557	618.037	709.005	866.833
CO2	Pow	514.47	436.925	513.853	494.448	493.59	476.7	496.31	506.849	463.46	480.425	489.989	525.8
	Ind	505.694	444.971	559.56	558.48	579.958	618.465	603.352	579.472	600.121	600.684	628.245	645.52
	Resi	381.639	305.344	275.595	203.535	199.781	192.745	199.061	199.531	193.653	209.152	255.648	328.049
	Tran	130.432	124.183	130.695	127.059	128.518	127.022	128.993	129.111	126.969	129.126	127.326	130.184
	Total	1532.23	1311.42	1479.7	1383.52	1401.85	1414.93	1427.72	1414.96	1384.2	1419.39	1501.21	1629.55

## Sheet: TableS8
Table S9. Monthly emissions by sectors in China (Units: Tg/month for CO2 and Gg/month for other species).
Species	Sectors	Jan	Feb	Mar	Apri	May	Jun	Jul	Aug	Sep	Oct	Nov	Dec
SO2	Pow	747.242	600.645	739.129	704.373	686.142	643.654	660.887	688.539	613.545	625.196	695.862	760.672
	Ind	1205.6	1060.3	1364.79	1326.55	1368.54	1516.51	1458.18	1375.05	1452.61	1437.49	1564.77	1644.68
	Resi	665.286	463.369	380.448	174.966	161.169	155.964	161.165	161.165	155.97	179.934	323.111	506.004
	Tran	19.5376	19.3903	19.5149	19.4418	19.4756	19.4277	19.4764	19.4761	19.4291	19.4883	19.4672	19.5279
	Total	2637.67	2143.7	2503.88	2225.33	2235.33	2335.56	2299.71	2244.23	2241.56	2262.1	2603.21	2930.88
NOx	Pow	845.411	671.29	833.593	796.441	779.752	752.593	799.647	833.382	736.079	735.121	800.603	871.583
	Ind	805.157	687.978	898.972	885.956	922.095	1013.82	973.812	927.271	974.906	965.52	1062.53	1099.91
	Resi	202.108	153.438	119.563	60.4855	54.7658	53.0078	54.7632	54.7632	53.011	62.3399	109.204	162.594
	Tran	607.718	605.032	606.359	604.125	603.721	602.776	603.531	603.597	603.007	604.716	605.571	607.158
	Total	2460.39	2117.74	2458.49	2347.01	2360.33	2422.2	2431.75	2419.01	2367	2367.7	2577.91	2741.24
CO	Pow	184.891	147.92	182.978	174.823	171.397	166.047	176.43	182.925	161.376	161.773	175.425	190.694
	Ind	5391.7	4922.59	5962.86	6029.66	6210.63	6322.29	6048.26	5981.79	5935.5	5990.9	6186.54	6293.23
	Resi	13959.3	10191.5	7891.65	4044.65	3758.14	3637.07	3758.05	3758.05	3637.17	4168.7	6980.61	10794.4
	Tran	1892.06	1861.53	1819.35	1721.08	1656.15	1642.79	1647.07	1649.42	1655.5	1718.09	1814.23	1865.02
	Total	21427.9	17123.5	15856.8	11970.2	11796.3	11768.2	11629.8	11572.2	11389.5	12039.5	15156.8	19143.3
NMVOC	Pow	22.5017	17.9762	22.2882	21.4928	20.987	20.5528	21.8248	22.5995	20.0386	20.1064	21.6234	23.4698
	Ind	991.248	869.493	1144.48	1154.53	1206.94	1333.1	1276.98	1215.74	1295.04	1262.52	1330.12	1381.02
	Resi	1058.53	806.51	630.937	363.935	342.888	333.839	342.878	342.878	333.845	373.319	574.015	845.452
	Tran	219.293	217.413	215.714	211.131	208.895	207.924	210.231	210.075	208.423	211.339	215.014	217.8
	Total	2291.58	1911.39	2013.42	1751.09	1779.71	1895.42	1851.91	1791.29	1857.35	1867.29	2140.77	2467.74
NH3	Pow	0	0	0	0	0	0	0	0	0	0	0	0
	Ind	19.884	19.884	19.884	19.884	19.884	19.884	19.884	19.884	19.884	19.884	19.884	19.884
	Resi	37.5279	37.48	37.5278	37.5116	37.5265	37.5105	37.5262	37.5262	37.5106	37.5276	37.5118	37.5279
	Tran	6.29618	6.29616	6.29618	6.29617	6.29618	6.29617	6.29618	6.29618	6.29617	6.29618	6.29617	6.29618
	Agri	546.436	541.918	582.007	772.021	877.314	991.631	941.597	1042.01	776.695	637.748	699.722	630.599
	Total	610.144	605.578	645.715	835.712	941.021	1055.32	1005.3	1105.71	840.386	701.456	763.414	694.307
PM10	Pow	123.915	98.5965	122.601	117.13	114.018	110.901	117.304	121.594	107.961	108.504	118.071	128.465
	Ind	673.111	588.159	760.026	773.695	805.422	850.743	813.777	793.189	817.592	816.171	868.08	891.08
	Resi	952.225	693.184	538.345	279.302	260.616	252.222	260.613	260.613	252.223	287.951	474.811	734.239
	Tran	44.5869	44.2664	44.3539	44.0767	43.7959	43.619	43.6503	43.7016	43.73	44.0753	44.2615	44.4855
	Total	1793.84	1424.21	1465.33	1214.2	1223.85	1257.48	1235.34	1219.1	1221.51	1256.7	1505.22	1798.27
PM2.5	Pow	79.6294	63.2633	78.7543	75.2689	73.2944	71.2471	75.4012	78.2872	69.4514	69.7461	75.89	82.5557
	Ind	435.696	382.667	489.225	497.823	517.766	543.773	519.647	508.098	522.046	521.768	553.884	568.256
	Resi	857.646	624.942	483.683	253.239	236.856	229.225	236.853	236.853	229.227	261.103	426.828	660.923
	Tran	42.9276	42.6647	42.6959	42.4389	42.1451	41.9892	42.0027	42.0529	42.098	42.4197	42.6228	42.8268
	Total	1415.9	1113.54	1094.36	868.769	870.061	886.234	873.904	865.291	862.822	895.036	1099.23	1354.56
BC	Pow	0.163262	0.130711	0.161738	0.15478	0.151297	0.147118	0.155735	0.161456	0.144134	0.14458	0.155885	0.169054
	Ind	41.5284	37.7576	46.4831	47.0471	48.8343	52.1138	49.6117	47.7365	49.6165	49.0602	51.2057	53.5743
	Resi	166.859	119.201	93.5279	48.0256	45.1026	43.6474	45.1022	45.1022	43.6478	49.4989	81.2826	126.716
	Tran	23.5909	23.4748	23.5199	23.4252	23.2722	23.1852	23.1836	23.2143	23.2483	23.4155	23.4832	23.5602
	Total	232.142	180.565	163.693	118.653	117.36	119.094	118.053	116.215	116.657	122.119	156.127	204.019
OC	Pow	0.00161054	0.00144839	0.00161245	0.00156104	0.00161028	0.00155994	0.00161725	0.00162146	0.00156604	0.00160996	0.0015601	0.00161467
	Ind	39.2399	36.0025	43.232	43.9241	45.5193	47.588	45.2124	43.9041	45.1147	44.9082	46.5554	48.6308
	Resi	495.378	359.322	278.421	148.856	140.192	135.674	140.191	140.191	135.675	153.517	244.695	379.811
	Tran	8.83529	8.75106	8.76348	8.68142	8.56897	8.51105	8.51099	8.5313	8.55404	8.67186	8.73881	8.80386
	Total	543.455	404.077	330.418	201.463	194.282	191.774	193.916	192.628	189.345	207.099	299.991	437.247
CO2	Pow	289.659	229.964	285.336	272.679	268.298	259.07	274.867	286.943	253.799	252.921	274.212	297.522
	Ind	339.336	289.658	389.142	392.148	411.022	452.852	434.437	413.539	436.098	430.121	463.481	476.35
	Resi	227.129	167.625	130.665	67.8189	62.9133	60.8888	62.9117	62.9117	60.8909	69.8979	116.135	176.562
	Tran	57.1485	56.8493	57.1101	56.973	57.0499	56.9517	57.0514	57.051	56.9538	57.0684	57.0119	57.1318
	Total	913.273	744.095	862.253	789.619	799.284	829.763	829.267	820.444	807.742	810.009	910.84	1007.57

## Sheet: TableS9
Table S10. Monthly emissions by sectors in Other East Asia (Units: Tg/month for CO2 and Gg/month for other species).
Species	Sectors	Jan	Feb	Mar	Apri	May	Jun	Jul	Aug	Sep	Oct	Nov	Dec
SO2	Pow	35.4442	32.5778	34.7164	35.0803	35.9435	35.5396	36.9425	36.7892	35.8172	36.5274	34.9899	36.3157
	Ind	53.0442	51.6179	54.5588	53.5506	53.571	53.5478	54.9138	52.7204	53.4165	55.1551	54.1164	54.1735
	Resi	16.9	15.5617	16.1229	15.3696	15.0139	14.9696	15.7604	16.4034	15.9258	15.8881	15.3376	15.9937
	Tran	14.3882	14.1214	14.9104	14.58	14.5273	14.5462	14.8673	14.8291	14.8387	14.9677	14.7412	14.9334
	Total	119.777	113.879	120.308	118.58	119.056	118.603	122.484	120.742	119.998	122.538	119.185	121.416
NOx	Pow	37.9925	35.4063	37.1636	37.865	38.6454	38.4	39.7759	39.6102	38.7209	39.3829	37.8502	39.1419
	Ind	53.1118	52.145	54.9289	53.969	53.7721	54.007	55.3412	52.7887	53.8921	55.6694	54.655	54.4661
	Resi	33.6637	30.9379	31.1714	29.2566	28.5178	28.152	29.5794	30.8423	29.8763	29.3775	28.6301	30.8639
	Tran	166.874	158.658	169.701	149.787	143.817	139.079	136.995	136.048	138.441	147.919	152.994	164.929
	Total	291.642	277.147	292.965	270.877	264.752	259.638	261.691	259.289	260.93	272.349	274.129	289.401
CO	Pow	5.81419	5.52164	5.73389	5.78618	5.85848	5.83289	5.97678	5.95355	5.85901	5.92785	5.77942	5.91151
	Ind	275.232	258.716	283.494	275.929	279.851	276.091	283.853	276.071	275.869	285.87	277.346	280.769
	Resi	127.948	116.285	125.122	116.711	112.175	107.866	111.094	111.186	108.386	117.478	121.354	126.438
	Tran	596.188	529.226	555.424	454.705	429.288	377.764	370.382	371.276	378.246	432.652	480.542	562.433
	Total	1005.18	909.749	969.774	853.131	827.172	767.554	771.306	764.487	768.36	841.928	885.021	975.551
NMVOC	Pow	1.09127	1.02863	1.06754	1.09109	1.11008	1.10631	1.14182	1.13731	1.11552	1.13092	1.09059	1.12384
	Ind	114.335	112.76	118.388	123.353	122.618	123.298	130.055	128.259	128.973	125.331	124.303	123.131
	Resi	23.9025	22.2655	23.5033	21.1448	20.4063	19.8662	20.3861	20.4497	20.1475	21.3511	22.3293	23.6956
	Tran	46.1004	42.0838	44.5847	38.5391	36.4102	34.5953	34.715	35.2465	34.5873	37.2379	39.2843	43.6633
	Total	185.429	178.138	187.544	184.128	180.544	178.866	186.298	185.092	184.823	185.051	187.007	191.614
NH3	Pow	0.274602	0.250022	0.26696	0.272189	0.281079	0.277233	0.291167	0.289851	0.280303	0.287878	0.272189	0.285465
	Ind	2.13583	2.07053	2.21396	2.18477	2.17793	2.13164	2.1048	2.06224	2.09792	2.1531	2.1118	2.15795
	Resi	8.51813	7.41964	8.77474	9.37965	12.3745	16.0125	18.3428	17.3923	14.6175	11.5958	9.94371	9.11387
	Tran	1.99303	1.81931	1.99798	1.86457	1.91946	1.86676	1.92602	1.92711	1.86239	1.92383	1.86239	1.92711
	Agri	36.8168	31.3557	38.5281	42.3452	59.9919	79.954	93.2818	87.4804	71.8921	54.0438	44.888	39.6016
	Total	49.7384	42.9153	51.7817	56.0463	76.7449	100.242	115.947	109.152	90.7502	70.0044	59.0781	53.0859
PM10	Pow	13.7556	12.4344	13.7284	13.3397	13.7552	13.3529	13.8069	13.7903	13.3567	13.7789	13.3355	13.7812
	Ind	23.8292	22.4593	24.041	23.5072	23.9113	23.5717	24.0799	23.8144	23.5221	24.1108	23.6407	24.0344
	Resi	7.21431	6.53706	6.9778	6.32727	5.94584	5.73038	5.93481	5.97548	5.82776	6.46154	6.78647	7.13549
	Tran	7.67967	7.39511	7.96048	7.06874	6.82863	6.9701	7.02916	7.07518	7.01406	7.22165	7.16828	7.41831
	Total	52.4787	48.8258	52.7077	50.2429	50.441	49.6251	50.8508	50.6554	49.7207	51.573	50.931	52.3693
PM2.5	Pow	5.44685	4.92434	5.43146	5.28669	5.44397	5.29401	5.47554	5.4647	5.29542	5.45758	5.28413	5.46013
	Ind	11.8535	11.291	11.9913	11.7536	11.9053	11.7912	12.016	11.8397	11.7598	12.0354	11.8388	11.9839
	Resi	4.58548	4.15799	4.39365	3.89494	3.55567	3.42049	3.54298	3.57152	3.49176	3.96428	4.28791	4.5273
	Tran	6.58696	6.35127	6.80326	6.07246	5.86517	5.97244	6.01421	6.05453	6.00984	6.18963	6.15706	6.36528
	Total	28.4727	26.7246	28.6197	27.0077	26.7701	26.4782	27.0488	26.9305	26.5568	27.6469	27.5679	28.3366
BC	Pow	0.0273128	0.0247279	0.0267937	0.0269091	0.0277184	0.0272456	0.0284282	0.0283211	0.0274438	0.0281802	0.0269037	0.0280324
	Ind	1.62896	1.56618	1.64735	1.62238	1.6394	1.627	1.65335	1.63041	1.62356	1.65437	1.62694	1.64283
	Resi	0.750303	0.680284	0.723233	0.643445	0.592957	0.570053	0.589221	0.591687	0.578277	0.655211	0.709314	0.744747
	Tran	2.9146	2.79426	2.98181	2.63626	2.53868	2.58568	2.59124	2.61277	2.57512	2.65765	2.6518	2.75003
	Total	5.32117	5.06546	5.37918	4.929	4.79875	4.80998	4.86224	4.86319	4.8044	4.99541	5.01496	5.16564
OC	Pow	0.00798008	0.00719089	0.00782589	0.00785272	0.00811072	0.00795449	0.00831436	0.00828776	0.00801641	0.00824792	0.00785273	0.0081993
	Ind	0.494811	0.471254	0.512274	0.500754	0.505175	0.5039	0.516687	0.495945	0.501409	0.517989	0.504306	0.506881
	Resi	1.74747	1.58422	1.69117	1.49838	1.34696	1.29296	1.33455	1.33655	1.30956	1.51664	1.68013	1.74369
	Tran	1.19086	1.13955	1.2044	1.08565	1.04031	1.04388	1.04493	1.05453	1.04676	1.08901	1.09587	1.13665
	Total	3.44112	3.20222	3.41567	3.09264	2.90056	2.84869	2.90449	2.89532	2.86575	3.13189	3.28816	3.39542
CO2	Pow	50.7723	47.598	49.5134	50.8201	51.8257	51.6464	53.4921	53.2708	52.1488	52.9428	50.8148	52.5498
	Ind	47.3794	46.9118	49.4702	48.7722	48.3929	48.7653	50.0972	47.2761	48.6915	50.4564	49.2659	48.8307
	Resi	23.8098	22.0286	21.3485	19.0203	17.7828	17.0728	17.5965	18.0696	17.646	18.2438	19.1195	21.6828
	Tran	26.1512	24.601	26.4581	24.4067	24.3146	24.3907	24.7944	24.915	24.335	24.9117	24.6359	25.9176
	Total	148.113	141.139	146.79	143.019	142.316	141.875	145.98	143.531	142.821	146.555	143.836	148.981

## Sheet: TableS10
Table S11. Monthly emissions by sectors in India (Units: Tg/month for CO2 and Gg/month for other species).
Species	Sectors	Jan	Feb	Mar	Apri	May	Jun	Jul	Aug	Sep	Oct	Nov	Dec
SO2	Pow	478.442	440.929	488.808	465.449	471.195	440.644	432.9	425.406	426.608	462.031	458.256	485.693
	Ind	250.485	242.879	264.116	235.515	241.301	238.384	241.363	242.063	245.211	243.224	248.13	266.653
	Resi	58.6829	57.9546	56.8677	56.6445	56.6641	56.6189	56.6545	56.6529	56.6192	56.6804	56.6978	57.9877
	Tran	11.6645	11.0577	11.7518	11.5806	11.7599	11.3423	11.487	11.5392	11.5641	11.6245	11.6362	11.7394
	Total	799.275	752.821	821.543	769.189	780.92	746.989	742.405	735.662	740.003	773.56	774.72	822.073
NOx	Pow	199.269	199.171	199.269	199.236	199.269	199.236	199.269	199.269	199.236	199.269	199.236	199.269
	Ind	82.6627	75.1003	82.9976	80.4661	82.8699	80.6471	82.0734	81.9263	79.6472	82.3911	79.5165	82.7687
	Resi	84.9745	74.9813	81.883	79.0175	81.4955	78.8085	81.367	81.3411	78.8151	81.6123	79.5451	84.0087
	Tran	449.655	402.816	443.512	428.913	442.972	428.565	442.696	442.671	428.577	443.172	430.243	449.028
	Total	816.561	752.069	807.662	787.633	806.607	787.257	805.406	805.207	786.276	806.444	788.542	815.074
CO	Pow	232.096	217.377	245.008	230.764	231.182	217.766	213.97	210.363	193.098	233.625	214.032	236.355
	Ind	1540.78	1404.4	1546.63	1507.46	1547.72	1506.11	1531.18	1530.03	1489.5	1539.02	1478.79	1542.13
	Resi	3009.75	2658.37	2904.11	2802.17	2890.08	2794.85	2885.63	2884.72	2795.08	2894.23	2820.88	2977.02
	Tran	1089.38	959.36	1030.92	987.046	1019.14	987.876	1025.66	1026.83	997.069	1035.51	1021.13	1087.11
	Total	5872	5239.5	5726.67	5527.44	5688.12	5506.6	5656.44	5651.94	5474.75	5702.39	5534.84	5842.61
NMVOC	Pow	10.8484	10.1598	11.4509	10.7857	10.8058	10.1791	10.0026	9.83429	9.02807	10.9198	10.0049	11.0471
	Ind	287.295	260.29	287.71	276.979	286.269	277.711	286.029	285.136	274.918	285.899	275.834	287.866
	Resi	643.158	566.692	618.348	596.587	615.267	594.971	614.242	614.033	595.025	616.171	600.796	635.33
	Tran	524.03	469.351	515.047	497.459	513.887	497.305	514.292	514.377	498.166	515.497	501.656	523.597
	Total	1465.33	1306.49	1432.56	1381.81	1426.23	1380.17	1424.57	1423.38	1377.14	1428.49	1388.29	1457.84
NH3	Pow	0.6597	0.617826	0.696341	0.655885	0.657106	0.619	0.608263	0.598027	0.548998	0.664039	0.608403	0.671786
	Ind	14.6484	13.2325	14.6487	14.1771	14.6488	14.1772	14.6477	14.6477	14.176	14.6482	14.1755	14.6485
	Resi	187.171	168.048	185.393	179.284	185.173	179.165	185.096	185.081	179.169	185.239	179.591	186.616
	Tran	0.763696	0.690029	0.763696	0.739141	0.763696	0.739141	0.763696	0.763696	0.739141	0.763696	0.739141	0.763696
	Agri	636.618	575.03	636.618	616.119	636.634	616.162	636.659	636.66	616.174	636.759	616.091	636.951
	Total	839.861	757.618	838.12	810.975	837.876	810.863	837.775	837.751	810.807	838.074	811.205	839.651
PM10	Pow	176.041	164.876	185.833	175.03	175.347	165.172	162.294	159.558	146.464	177.2	162.34	179.271
	Ind	109.618	102.447	113.385	107.016	108.877	105.412	105.828	105.203	103.683	109.051	103.271	110.162
	Resi	254.737	241.166	246.571	242.453	245.57	242.089	245.347	245.308	242.099	245.768	243.133	251.778
	Tran	73.0308	64.4196	70.4744	68.067	70.2439	67.9438	70.1356	70.1237	67.9498	70.3174	68.4686	72.6325
	Total	613.427	572.908	616.264	592.566	600.038	580.617	583.605	580.193	560.195	602.337	577.213	613.843
PM2.5	Pow	73.0767	68.4416	77.1413	72.6569	72.789	68.5652	67.3708	66.2353	60.7998	73.558	67.3897	74.4174
	Ind	79.4483	74.0305	82.0258	77.6178	79.0134	76.2584	76.8608	76.516	75.365	79.1513	74.9801	79.9793
	Resi	228.494	216.144	220.966	217.248	220.038	216.902	219.826	219.789	216.912	220.225	217.894	225.777
	Tran	70.2678	61.9632	67.7753	65.4575	67.5488	65.3363	67.4424	67.4307	65.3423	67.6211	65.8505	69.8801
	Total	451.287	420.579	447.909	432.98	439.389	427.062	431.5	429.971	418.419	440.556	426.115	450.054
BC	Pow	0.0930467	0.0857495	0.0950606	0.0905192	0.0916387	0.0857001	0.0841985	0.0827425	0.0829731	0.0898581	0.0891217	0.0944554
	Ind	18.3432	17.7984	19.376	17.2553	17.6926	17.4458	17.649	17.6961	17.9347	17.7892	18.1458	19.5285
	Resi	60.822	60.042	58.9048	58.6798	58.7022	58.6532	58.691	58.6891	58.6536	58.7179	58.733	60.0929
	Tran	7.68805	7.62285	7.64112	7.61868	7.63534	7.61174	7.62304	7.62396	7.61994	7.62968	7.64666	7.69973
	Total	86.9463	85.5491	86.0171	83.6443	84.1218	83.7965	84.0473	84.0919	84.2912	84.2267	84.6145	87.4156
OC	Pow	0.24841	0.228897	0.25375	0.241654	0.244678	0.228877	0.224952	0.221092	0.221648	0.239957	0.237949	0.252145
	Ind	16.9451	16.3819	17.8322	15.9371	16.3473	16.0945	16.3114	16.3575	16.5489	16.4569	16.725	17.97
	Resi	195.237	192.541	188.949	188.186	188.278	188.082	188.234	188.226	188.084	188.339	188.391	192.873
	Tran	4.35761	4.29984	4.34692	4.29804	4.322	4.29406	4.30543	4.30145	4.30594	4.31499	4.32841	4.37457
	Total	216.788	213.452	211.382	208.663	209.192	208.7	209.075	209.106	209.16	209.351	209.683	215.47
CO2	Pow	76.8758	71.9908	81.1367	76.427	76.5741	72.1377	70.8943	69.704	63.9974	77.3803	70.9054	78.2812
	Ind	50.0057	45.9185	50.873	49.1224	50.1245	48.5333	48.6418	48.3979	47.1755	49.9241	46.8167	49.5198
	Resi	57.6554	50.9823	55.7699	53.8305	55.5319	53.7066	55.4557	55.4403	53.7106	55.602	54.1499	57.0513
	Tran	12.4827	11.2755	12.4827	12.0803	12.4827	12.0803	12.4827	12.4827	12.0803	12.4827	12.0803	12.4827
	Total	197.02	180.167	200.262	191.46	194.713	186.458	187.475	186.025	176.964	195.389	183.952	197.335

## Sheet: TableS11
Table S12. Monthly emissions by sectors in Other South Asia (Units: Tg/month for CO2 and Gg/month for other species).
Species	Sectors	Jan	Feb	Mar	Apri	May	Jun	Jul	Aug	Sep	Oct	Nov	Dec
SO2	Pow	65.777	59.4118	65.7773	63.6552	65.7768	63.6545	65.7757	65.7754	63.6541	65.7765	63.655	65.7772
	Ind	46.3971	41.9428	46.4264	44.8855	46.3773	44.8917	46.3775	46.379	44.9064	46.3815	44.9127	46.4319
	Resi	14.4183	12.2996	12.6956	12.1586	12.5204	12.1188	12.5129	12.5128	12.12	12.5621	12.4658	14.3288
	Tran	19.5781	17.6868	19.5786	18.9484	19.5787	18.9469	19.577	19.5773	18.9483	19.5778	18.9487	19.5785
	Total	146.17	131.341	144.478	139.648	144.253	139.612	144.243	144.245	139.629	144.298	139.982	146.116
NOx	Pow	24.616	22.243	24.616	23.825	24.616	23.825	24.616	24.616	23.825	24.616	23.825	24.616
	Ind	13.9975	12.6512	14.0047	13.5539	14.0024	13.5595	13.9886	13.9841	13.5396	13.9921	13.5376	13.9998
	Resi	38.2606	32.0781	32.6272	31.1444	32.0532	31.002	32.0271	32.0269	31.0062	32.2001	32.1601	37.9394
	Tran	75.0718	67.3123	73.0755	70.3721	72.5327	70.0666	72.3962	72.3969	70.2289	72.7432	71.4641	75.1581
	Total	151.946	134.285	144.323	138.895	143.204	138.453	143.028	143.024	138.6	143.552	140.987	151.713
CO	Pow	4.35789	3.93659	4.3586	4.21765	4.35784	4.21693	4.35688	4.35668	4.21556	4.35797	4.21672	4.35812
	Ind	215.35	194.728	215.431	208.625	215.451	208.695	215.164	215.136	208.336	215.264	208.178	215.366
	Resi	1184.11	990.675	1003.75	957.102	984.82	952.488	983.974	983.967	952.631	989.698	990.862	1173.48
	Tran	140.545	124.12	124.882	114.86	115.21	109.733	112.768	113.791	113.472	120.833	127.162	141.523
	Total	1544.36	1313.46	1348.42	1284.81	1319.84	1275.13	1316.26	1317.25	1278.66	1330.15	1330.42	1534.73
NMVOC	Pow	0.513722	0.464105	0.513885	0.497228	0.51371	0.497064	0.513493	0.513447	0.496752	0.513741	0.497016	0.513776
	Ind	53.9096	48.7014	53.9152	52.1613	53.9004	52.1695	53.8982	53.8887	52.1402	53.8961	52.1492	53.9164
	Resi	246.846	209.196	216.091	206.784	212.935	205.967	212.787	212.786	205.992	213.772	212.288	244.835
	Tran	59.8972	53.4389	56.7479	53.9596	55.2904	53.2347	54.9259	55.0059	53.7414	56.0707	56.2029	60.1099
	Total	361.167	311.8	327.268	313.402	322.639	311.868	322.125	322.194	312.37	324.253	321.137	359.375
NH3	Pow	0.0345126	0.031184	0.0345314	0.0334083	0.0345113	0.0333894	0.0344863	0.034481	0.0333536	0.0345148	0.033384	0.0345188
	Ind	3.18647	2.87812	3.18648	3.08369	3.18648	3.0837	3.18646	3.18646	3.08368	3.18647	3.08367	3.18648
	Resi	63.6559	56.3297	61.0748	58.9132	60.8154	58.8464	60.8041	60.8041	58.8484	60.8841	59.3675	63.4827
	Tran	0.102576	0.0926636	0.102576	0.0992719	0.102576	0.0992719	0.102576	0.102576	0.0992719	0.102576	0.0992719	0.102576
	Agri	227.01	205.044	227.01	219.689	227.01	219.694	227.015	227.015	219.694	227.011	219.688	227.012
	Total	293.99	264.376	291.409	281.818	291.149	281.757	291.143	291.143	281.759	291.219	282.272	293.818
PM10	Pow	2.00122	1.80755	2.00122	1.93666	2.00122	1.93666	2.00122	2.00122	1.93666	2.00122	1.93666	2.00122
	Ind	33.9488	30.6963	33.9958	32.889	33.9535	32.8461	33.8857	33.8731	32.7931	33.9548	32.7692	33.9173
	Resi	75.5156	63.329	64.2638	61.3762	63.1112	61.0849	63.0584	63.0579	61.0935	63.4111	63.3764	74.751
	Tran	8.27668	7.26653	7.507	7.16859	7.34353	7.0889	7.32241	7.32261	7.11947	7.41567	7.53572	8.31509
	Total	119.742	103.099	107.768	103.37	106.41	102.957	106.268	106.255	102.943	106.783	105.618	118.985
PM2.5	Pow	0.983544	0.888361	0.983544	0.951816	0.983544	0.951816	0.983544	0.983544	0.951816	0.983544	0.951816	0.983544
	Ind	19.6356	17.7568	19.6677	19.0265	19.6394	18.996	19.5936	19.5852	18.9621	19.6404	18.9454	19.6151
	Resi	73.1236	61.3072	62.2078	59.4105	61.0908	59.1284	61.0396	61.0392	59.1367	61.381	61.3476	72.3801
	Tran	8.04571	7.06062	7.28464	6.95406	7.12221	6.87485	7.10128	7.10147	6.90526	7.19392	7.31775	8.08402
	Total	101.788	87.013	90.1437	86.3428	88.8359	85.9511	88.718	88.7094	85.9559	89.1989	88.5626	101.063
BC	Pow	0.0159299	0.0143883	0.0159299	0.0154161	0.0159299	0.0154161	0.0159299	0.0159299	0.0154161	0.0159299	0.0154161	0.0159299
	Ind	1.5505	1.40375	1.55327	1.49916	1.54876	1.49967	1.54864	1.54877	1.50098	1.54902	1.50155	1.55368
	Resi	14.3896	12.0484	12.1759	11.6257	11.9528	11.5741	11.9432	11.9431	11.5756	12.0068	12.0118	14.2342
	Tran	3.42263	2.94122	2.82188	2.66145	2.70141	2.60232	2.68713	2.68745	2.626	2.75599	2.95368	3.46295
	Total	19.3787	16.4078	16.567	15.8017	16.2189	15.6915	16.1949	16.1953	15.718	16.3277	16.4824	19.2668
OC	Pow	0.0731225	0.0660462	0.0731225	0.0707637	0.0731225	0.0707637	0.0731225	0.0731225	0.0707637	0.0731225	0.0707637	0.0731225
	Ind	6.4013	5.78321	6.40245	6.19424	6.40055	6.19445	6.40051	6.40056	6.19501	6.40068	6.19522	6.40259
	Resi	57.9907	48.5347	49.0607	46.8378	48.1609	46.6294	48.1221	48.1218	46.6355	48.3788	48.3959	57.3667
	Tran	2.81095	2.43551	2.39994	2.27474	2.31748	2.23432	2.30768	2.30787	2.25054	2.35479	2.47471	2.83857
	Total	67.276	56.8194	57.9362	55.3776	56.9521	55.129	56.9034	56.9033	55.1518	57.2073	57.1366	66.681
CO2	Pow	6.7367	6.08588	6.73856	6.52028	6.73657	6.5184	6.73408	6.73356	6.51484	6.73692	6.51786	6.73731
	Ind	7.88098	7.12948	7.89591	7.63683	7.88287	7.62889	7.86001	7.85482	7.60692	7.87957	7.60098	7.87327
	Resi	19.2081	16.1778	16.4932	15.7531	16.2151	15.6836	16.2024	16.2023	15.6857	16.287	16.2548	19.0825
	Tran	4.19302	3.78735	4.19302	4.0578	4.19301	4.0578	4.19301	4.19301	4.0578	4.19301	4.0578	4.19302
	Total	38.0188	33.1805	35.3207	33.9681	35.0275	33.8887	34.9895	34.9837	33.8653	35.0965	34.4315	37.8861

## Sheet: TableS12
Table S13. Monthly emissions by sectors in Southeast Asia (Units: Tg/month for CO2 and Gg/month for other species).
Species	Sectors	Jan	Feb	Mar	Apri	May	Jun	Jul	Aug	Sep	Oct	Nov	Dec
SO2	Pow	134.673	120.829	135.863	132.219	134.408	131.161	136.393	135.996	131.69	135.731	131.63	135.863
	Ind	178.213	161.958	177.477	171.862	178.118	173.114	178.876	178.653	172.568	178.265	172.995	178.69
	Resi	30.9477	27.8816	30.8658	29.8703	30.8655	29.8702	30.8655	30.8655	29.8702	30.8656	29.8705	30.9473
	Tran	32.9951	29.8042	32.9951	31.9314	32.9951	31.9313	32.9949	32.995	31.9314	32.995	31.9315	32.9951
	Total	376.829	340.472	377.202	365.884	376.387	366.076	379.13	378.509	366.06	377.856	366.427	378.495
NOx	Pow	95.6834	85.7422	96.6832	94.1838	95.4604	93.2929	97.1225	96.7888	93.7354	96.5655	93.6864	96.6804
	Ind	63.192	57.5636	63.1075	61.1817	63.3829	61.7455	63.8154	63.8187	61.2703	63.4454	61.6219	63.7008
	Resi	33.6405	30.362	33.6125	32.5278	33.6121	32.5277	33.6121	33.6121	32.5277	33.6121	32.5283	33.6401
	Tran	241.32	217.958	241.212	233.45	241.209	233.448	241.208	241.208	233.448	241.211	233.497	241.325
	Total	433.836	391.626	434.616	421.343	433.664	421.014	435.758	435.428	420.981	434.834	421.334	435.346
CO	Pow	49.1846	44.3565	49.2839	47.7551	49.1619	47.665	49.3238	49.2903	47.7076	49.2673	47.7034	49.2815
	Ind	365.291	330.751	365.721	355.403	367.021	354.217	365.205	366.395	352.662	365.583	353.739	366.657
	Resi	2278.4	2056.01	2276.1	2202.65	2276.06	2202.65	2276.06	2276.06	2202.65	2276.07	2202.68	2278.37
	Tran	1647.04	1477.26	1628.76	1566.91	1616.83	1572.61	1631.81	1633.83	1581.42	1636.31	1590.43	1649.66
	Total	4339.91	3908.38	4319.86	4172.72	4309.08	4177.14	4322.41	4325.58	4184.44	4327.22	4194.55	4343.97
NMVOC	Pow	9.2991	8.382	9.32435	9.0392	9.29349	9.01676	9.33556	9.32715	9.02799	9.32154	9.02672	9.32435
	Ind	271.383	245.204	269.211	260.426	269.715	261.623	270.107	269.64	261.526	270.29	261.98	270.515
	Resi	492.1	444.36	491.934	476.063	491.929	476.062	491.929	491.929	476.062	491.93	476.068	492.096
	Tran	644.384	580.039	640.928	618.508	638.636	619.376	641.235	641.634	621.047	642.309	622.982	644.925
	Total	1417.17	1277.99	1411.4	1364.04	1409.57	1366.08	1412.61	1412.53	1367.66	1413.85	1370.06	1416.86
NH3	Pow	0.809209	0.72932	0.811527	0.786785	0.808694	0.784724	0.812558	0.811785	0.785754	0.811269	0.785639	0.811527
	Ind	11.3058	10.2146	11.3057	10.9418	11.306	10.9426	11.3066	11.3066	10.942	11.3061	10.9423	11.3063
	Resi	96.7687	87.4063	96.7647	93.6442	96.7643	93.6441	96.7643	96.7643	93.6441	96.7644	93.6446	96.7683
	Tran	1.24863	1.1285	1.24863	1.20859	1.24863	1.20859	1.24863	1.24863	1.20859	1.24863	1.20859	1.24863
	Agri	279.717	252.759	279.785	271.055	280.087	270.862	280.342	279.947	270.888	279.757	270.714	279.77
	Total	389.85	352.238	389.916	377.636	390.215	377.442	390.474	390.079	377.469	389.888	377.295	389.905
PM10	Pow	45.6641	41.1014	45.8751	44.5262	45.6172	44.3386	45.9689	45.8986	44.4324	45.8517	44.4218	45.8751
	Ind	74.5374	64.8251	75.814	76.4585	76.672	75.7896	77.5164	77.0926	72.9246	77.0732	73.3028	79.8089
	Resi	125.698	113.404	125.532	121.483	125.529	121.482	125.529	125.529	121.482	125.53	121.485	125.695
	Tran	11.1263	10.048	11.118	10.7597	11.1168	10.7594	11.1168	11.1168	10.7594	11.1168	10.7623	11.1268
	Total	257.026	229.379	258.339	253.227	258.935	252.37	260.132	259.637	249.599	259.571	249.972	262.506
PM2.5	Pow	13.2509	11.9294	13.3083	12.9146	13.2381	12.8636	13.3338	13.3147	12.8891	13.3019	12.8862	13.3083
	Ind	46.7261	40.6822	47.5417	48.0273	48.1579	47.5157	48.5641	48.3659	45.6579	48.3264	45.9425	50.0645
	Resi	121.542	109.663	121.39	117.474	121.388	117.474	121.388	121.388	117.474	121.388	117.476	121.539
	Tran	10.7365	9.69602	10.7284	10.3827	10.7272	10.3825	10.7273	10.7273	10.3825	10.7272	10.3853	10.737
	Total	192.255	171.971	192.969	188.799	193.511	188.236	194.013	193.796	186.404	193.744	186.69	195.649
BC	Pow	0.136505	0.123043	0.136876	0.132691	0.136423	0.132361	0.137041	0.136917	0.132526	0.136835	0.132508	0.136876
	Ind	2.32086	2.05715	2.33908	2.30409	2.34661	2.3002	2.36678	2.35614	2.26189	2.35801	2.26601	2.39985
	Resi	24.2839	21.9095	24.2517	23.4698	24.2513	23.4697	24.2513	24.2513	23.4697	24.2513	23.4702	24.2833
	Tran	5.38476	4.86355	5.38205	5.20919	5.38205	5.20918	5.38206	5.38206	5.20919	5.38204	5.20983	5.38546
	Total	32.126	28.9533	32.1097	31.1157	32.1164	31.1114	32.1372	32.1264	31.0733	32.1282	31.0785	32.2055
OC	Pow	0	0	0	0	0	0	0	0	0	0	0	0
	Ind	20.6564	18.4494	20.7553	20.3156	20.806	20.2813	20.9019	20.8528	20.0651	20.8573	20.0838	21.0676
	Resi	96.9302	87.4772	96.8301	93.7074	96.8284	93.7071	96.8284	96.8284	93.7071	96.8285	93.7089	96.9279
	Tran	5.616	5.07183	5.61405	5.43327	5.61404	5.43327	5.61405	5.61404	5.43328	5.61403	5.43374	5.61642
	Total	123.203	110.998	123.199	119.456	123.249	119.422	123.344	123.295	119.206	123.3	119.226	123.612
CO2	Pow	33.037	29.5714	33.4312	32.5971	32.9494	32.2467	33.6063	33.4749	32.4219	33.3873	32.4022	33.4312
	Ind	37.8868	34.0747	37.9984	37.1271	38.1545	37.2695	38.4368	38.3634	36.818	38.2519	36.9526	38.6375
	Resi	36.0556	32.5359	36.019	34.8567	36.0185	34.8566	36.0185	36.0185	34.8566	36.0185	34.8572	36.0552
	Tran	22.0732	19.943	22.0731	21.3631	22.0731	21.3631	22.0731	22.0731	21.3631	22.0731	21.3632	22.0732
	Total	129.053	116.125	129.522	125.944	129.196	125.736	130.135	129.93	125.46	129.731	125.575	130.197

## Sheet: TableS13
Table S14. Monthly emissions by sectors in Central Asia (Units: Tg/month for CO2 and Gg/month for other species).
Species	Sectors	Jan	Feb	Mar	Apri	May	Jun	Jul	Aug	Sep	Oct	Nov	Dec
SO2	Pow	90.5739	81.8087	90.5739	87.6519	90.5739	87.6519	90.5739	90.5739	87.6519	90.5739	87.6519	90.5739
	Ind	34.3842	31.091	34.5217	33.4583	34.563	33.5239	34.5368	34.5425	33.5513	34.5052	33.8426	34.4286
	Resi	14.6321	13.2697	13.9731	12.1378	12.0393	11.631	12.0187	12.0187	11.6451	12.7287	13.3521	14.6704
	Tran	1.70596	1.54104	1.70596	1.65098	1.70596	1.65098	1.70596	1.70596	1.65098	1.70596	1.65099	1.70596
	Total	141.296	127.711	140.775	134.899	138.882	134.458	138.835	138.841	134.499	139.514	136.498	141.379
NOx	Pow	32.1661	29.0532	32.1661	31.1284	32.1661	31.1284	32.1661	32.1661	31.1284	32.1661	31.1285	32.1661
	Ind	11.2674	10.1959	11.3392	10.9956	11.3568	11.027	11.3417	11.3463	11.0442	11.3296	11.1927	11.294
	Resi	13.7225	12.5808	11.4668	9.7518	9.76746	9.42589	9.74001	9.74001	9.43785	10.2073	11.5751	13.954
	Tran	29.2321	26.4656	28.3973	26.6356	27.0186	25.844	26.6697	26.6727	26.1672	27.5704	27.281	29.0848
	Total	86.3881	78.2955	83.3693	78.5114	80.3089	77.4253	79.9175	79.925	77.7776	81.2734	81.1772	86.499
CO	Pow	3.40302	3.07368	3.40302	3.29324	3.40302	3.29324	3.40303	3.40303	3.29324	3.40303	3.29326	3.40304
	Ind	26.6723	24.9559	29.5261	30.0416	30.7745	30.658	29.9719	30.763	31.2479	30.5392	32.4353	26.8087
	Resi	71.2033	65.3068	59.8223	39.432	34.1834	32.7797	33.8672	33.8672	32.9829	43.3068	56.8906	72.1016
	Tran	491.29	448.961	419.395	330.978	296.615	253.22	258.905	259.97	289.339	346.99	385.525	476.052
	Total	592.569	542.297	512.147	403.745	364.976	319.951	326.147	328.003	356.863	424.239	478.144	578.366
NMVOC	Pow	0.601399	0.543198	0.601399	0.581998	0.601399	0.581999	0.6014	0.6014	0.581998	0.6014	0.582	0.601401
	Ind	52.88	47.7642	52.8849	51.1842	52.8967	51.1976	52.8972	52.9013	51.2087	52.9046	51.2107	52.8941
	Resi	14.6625	13.3143	13.9886	12.6809	12.808	12.3803	12.7923	12.7923	12.3902	13.2102	13.5343	14.7232
	Tran	37.4593	34.0655	34.2306	29.7805	28.7446	26.3252	27.09	27.1253	27.9212	30.993	32.2342	36.7881
	Total	105.603	95.6872	101.706	94.2275	95.0507	90.4852	93.3809	93.4204	92.1021	97.7092	97.5612	105.007
NH3	Pow	0.0747234	0.0674921	0.0747234	0.0723129	0.0747234	0.0723129	0.0747234	0.0747234	0.0723129	0.0747234	0.0723129	0.0747234
	Ind	0.587669	0.53124	0.587978	0.569335	0.588187	0.569458	0.588107	0.588122	0.569514	0.588007	0.56999	0.587764
	Resi	7.22141	6.52516	7.19979	6.95445	7.18173	6.94972	7.18122	7.18122	6.95	7.18853	6.97328	7.22462
	Tran	0.0826555	0.0747058	0.0826555	0.0800054	0.0826555	0.0800054	0.0826555	0.0826555	0.0800054	0.0826555	0.0800054	0.0826555
	Agri	3.29255	2.98086	3.31935	3.24758	3.35901	3.24788	3.31035	3.46898	3.1989	3.30174	3.18865	3.2947
	Total	11.259	10.1795	11.2645	10.9237	11.2863	10.9194	11.2371	11.3957	10.8707	11.2357	10.8842	11.2645
PM10	Pow	0.350709	0.316769	0.350709	0.339395	0.350709	0.339395	0.350709	0.350709	0.339395	0.350709	0.339395	0.350709
	Ind	77.8785	70.6333	78.8085	76.726	79.2121	76.9465	78.967	79.2083	77.079	79.1323	77.3676	77.8479
	Resi	0.341893	0.312259	0.324887	0.258774	0.243734	0.23475	0.242393	0.242393	0.235663	0.275464	0.315427	0.346837
	Tran	2.9882	2.73039	2.53448	1.99145	1.79429	1.61062	1.64426	1.646	1.74273	2.08291	2.34269	2.90994
	Total	81.5593	73.9928	82.0185	79.3156	81.6008	79.1313	81.2044	81.4474	79.3967	81.8413	80.3651	81.4554
PM2.5	Pow	0.0965428	0.0871999	0.0965428	0.0934289	0.0965428	0.0934289	0.0965428	0.0965428	0.0934289	0.0965428	0.0934289	0.0965428
	Ind	35.619	32.3796	36.2794	35.4354	36.5664	35.5917	36.3925	36.5628	35.6833	36.5079	35.8845	35.5955
	Resi	0.258672	0.236308	0.248943	0.204988	0.195638	0.188501	0.194618	0.194618	0.189194	0.217297	0.243635	0.262888
	Tran	2.93297	2.67997	2.48695	1.95324	1.75923	1.57884	1.61179	1.6135	1.70872	2.043	2.29852	2.85602
	Total	38.9072	35.3831	39.1118	37.6871	38.6178	37.4525	38.2954	38.4675	37.6747	38.8647	38.5201	38.8109
BC	Pow	0.000338652	0.000305878	0.000338652	0.000327728	0.000338652	0.000327728	0.000338652	0.000338652	0.000327728	0.000338652	0.000327728	0.000338652
	Ind	0.523282	0.472731	0.523484	0.506706	0.523568	0.506688	0.523454	0.523479	0.506806	0.52353	0.50712	0.523711
	Resi	0.0508235	0.0464266	0.0489346	0.0403097	0.0384676	0.0370635	0.0382664	0.0382664	0.0372004	0.0427396	0.047889	0.0516476
	Tran	1.71052	1.56389	1.43437	1.10798	0.984796	0.876715	0.893817	0.89487	0.95696	1.16015	1.32188	1.66328
	Total	2.28496	2.08335	2.00712	1.65533	1.54717	1.42079	1.45588	1.45695	1.50129	1.72676	1.87722	2.23898
OC	Pow	4.99355e-05	4.51032e-05	4.99355e-05	4.83248e-05	4.99355e-05	4.83248e-05	4.99355e-05	4.99355e-05	4.83248e-05	4.99355e-05	4.83248e-05	4.99355e-05
	Ind	2.60865	2.38728	2.72331	2.69483	2.77613	2.72863	2.74683	2.78231	2.75319	2.77621	2.79515	2.60916
	Resi	0.194368	0.177652	0.187026	0.157561	0.151534	0.145993	0.150728	0.150728	0.14654	0.167109	0.183264	0.197701
	Tran	1.32902	1.21325	1.14054	0.912543	0.833696	0.754691	0.771592	0.772309	0.809463	0.953384	1.05854	1.29679
	Total	4.13209	3.77823	4.05093	3.76499	3.76141	3.62936	3.6692	3.7054	3.70924	3.89675	4.03701	4.1037
CO2	Pow	13.1708	11.8962	13.1708	12.7459	13.1708	12.7459	13.1708	13.1708	12.7459	13.1708	12.746	13.1708
	Ind	8.78504	7.95834	8.86562	8.62394	8.90867	8.65418	8.88787	8.89288	8.67133	8.86775	8.80174	8.81278
	Resi	10.4909	9.63747	8.53488	7.18511	7.19647	6.94253	7.17388	7.17388	6.95185	7.52561	8.70471	10.6916
	Tran	2.43576	2.20057	2.43576	2.35736	2.43575	2.35736	2.43575	2.43575	2.35736	2.43575	2.35736	2.43576
	Total	34.8826	31.6926	33.0071	30.9124	31.7117	30.7	31.6683	31.6733	30.7265	31.9999	32.6098	35.1109

## Sheet: TableS14
Table S15. Monthly emissions by sectors in Russia Asia (Units: Tg/month for CO2 and Gg/month for other species).
Species	Sectors	Jan	Feb	Mar	Apri	May	Jun	Jul	Aug	Sep	Oct	Nov	Dec
SO2	Pow	168.225	151.948	168.226	162.799	168.224	162.8	168.225	168.224	162.799	168.225	162.801	168.227
	Ind	169.086	153.088	169.708	164.34	169.682	163.881	169.226	169.395	164.189	169.413	164.422	169.563
	Resi	9.57327	8.6472	9.57054	8.44902	7.73966	7.14687	7.37228	7.38393	7.42642	8.91886	9.2176	9.56939
	Tran	7.3362	6.62681	7.3362	7.09984	7.33619	7.09982	7.33619	7.33619	7.09983	7.3362	7.09984	7.3362
	Total	354.221	320.31	354.84	342.688	352.982	340.928	352.159	352.34	341.514	353.893	343.54	354.696
NOx	Pow	97.5799	88.1401	97.5807	94.4296	97.5763	94.4302	97.5779	97.5766	94.429	97.5781	94.4321	97.5822
	Ind	14.875	13.6977	15.3259	14.8698	15.2629	14.5344	14.9369	15.0599	14.7548	15.082	14.9568	15.2222
	Resi	8.94092	8.0759	8.93997	7.27791	6.12169	5.40886	5.57469	5.58661	5.82074	7.9284	8.62759	8.93932
	Tran	87.4684	79.0217	87.2389	82.2806	81.9944	77.4189	79.3907	79.9621	79.1801	84.1524	84.2283	87.459
	Total	208.864	188.935	209.085	198.858	200.955	191.792	197.48	198.185	194.185	204.741	202.245	209.203
CO	Pow	40.6186	36.6888	40.6191	39.3083	40.6165	39.3086	40.6175	40.6167	39.3079	40.6175	39.3096	40.6198
	Ind	214.185	205.387	234.99	232.416	239.424	219.965	224.038	229.655	230.715	229.597	235.159	231.708
	Resi	112.819	101.903	112.782	90.3006	70.4928	59.8075	61.48	61.7721	66.4872	97.267	108.428	112.763
	Tran	1177.72	1063.8	1160.58	975.175	839.121	691.701	680.034	711.902	800.259	958.314	1108.05	1176.91
	Total	1545.35	1407.78	1548.97	1337.2	1189.66	1010.78	1006.17	1043.95	1136.77	1325.8	1490.95	1562
NMVOC	Pow	2.24181	2.02472	2.24184	2.16941	2.24477	2.17239	2.24176	2.24172	2.16939	2.24176	2.16948	2.24187
	Ind	128.954	116.55	129.073	124.931	129.241	125.036	129.02	129.046	124.929	129.043	124.942	129.056
	Resi	21.0606	19.0242	21.0592	19.5457	19.1603	18.161	18.7356	18.7492	18.4541	20.3469	20.3503	21.0583
	Tran	78.6115	71.0049	77.8552	68.7893	64.4776	57.0302	56.4233	57.853	60.9462	68.8689	74.6776	78.5755
	Total	230.868	208.604	230.229	215.436	215.124	202.399	206.42	207.89	206.499	220.501	222.14	230.932
NH3	Pow	0.494165	0.446348	0.494165	0.478232	0.494165	0.478232	0.494165	0.494165	0.478232	0.494165	0.478232	0.494165
	Ind	1.22015	1.10363	1.22244	1.18379	1.22271	1.18208	1.221	1.22164	1.18326	1.22162	1.18374	1.2219
	Resi	4.95772	4.47827	4.95771	4.74125	4.82605	4.64227	4.79582	4.79678	4.66467	4.91106	4.79702	4.95768
	Tran	0.184954	0.167211	0.184954	0.179042	0.184954	0.179042	0.184954	0.184954	0.179042	0.184954	0.179042	0.184954
	Agri	2.08182	1.88595	2.08207	2.02456	2.18791	2.0308	2.34192	2.09688	2.02473	2.08182	2.01654	2.08182
	Total	8.9388	8.08141	8.94134	8.60687	8.91579	8.51241	9.03786	8.79443	8.52992	8.89363	8.65457	8.94052
PM10	Pow	2.30243	2.07929	2.30315	2.22714	2.29964	2.22758	2.3009	2.29986	2.22662	2.30105	2.22899	2.30412
	Ind	160.836	148.186	166.028	161.584	167.714	159.365	163.93	165.261	162.08	165.257	163.274	165.705
	Resi	2.24633	2.02885	2.24628	1.90332	1.63933	1.46862	1.51293	1.5174	1.56349	2.00495	2.16918	2.24615
	Tran	10.9963	9.93293	10.8597	9.20274	7.57776	6.13622	5.96102	6.32203	7.22728	8.95903	10.3887	10.9909
	Total	176.381	162.228	181.437	174.918	179.23	169.198	173.705	175.401	173.098	178.522	178.061	181.246
PM2.5	Pow	1.29869	1.1729	1.29917	1.25617	1.29683	1.25646	1.29767	1.29697	1.25582	1.29776	1.25738	1.29979
	Ind	85.7619	79.5467	89.4798	87.2444	90.6968	85.6646	87.9881	88.9418	87.6109	88.9376	88.4606	89.2552
	Resi	2.0146	1.81968	2.01459	1.70435	1.4648	1.31059	1.35007	1.35405	1.39653	1.79525	1.94584	2.01448
	Tran	10.7961	9.75222	10.6618	9.03366	7.43653	6.02036	5.84784	6.20268	7.09253	8.79399	10.1994	10.7908
	Total	99.8713	92.2915	103.455	99.2385	100.895	94.252	96.4837	97.7955	97.3557	100.825	101.863	103.36
BC	Pow	0.185893	0.167903	0.185894	0.179895	0.185889	0.179896	0.185891	0.185889	0.179895	0.185891	0.179898	0.185895
	Ind	1.81594	1.6429	1.82037	1.76359	1.81934	1.75868	1.81621	1.81748	1.76051	1.81748	1.76102	1.81816
	Resi	0.400904	0.362109	0.400902	0.340752	0.293533	0.262623	0.270542	0.271332	0.279807	0.35898	0.387214	0.400881
	Tran	6.28793	5.67993	6.20693	5.2324	4.2689	3.42179	3.31078	3.52474	4.06835	5.08237	5.93521	6.28473
	Total	8.69066	7.85283	8.61409	7.51663	6.56766	5.623	5.58342	5.79944	6.28857	7.44472	8.26335	8.68967
OC	Pow	0.73913	0.667607	0.73913	0.715295	0.73913	0.715295	0.73913	0.73913	0.715295	0.73913	0.715295	0.73913
	Ind	8.25302	7.75651	8.79289	8.60377	8.97901	8.3853	8.58713	8.7249	8.66769	8.72365	8.78963	8.76352
	Resi	1.59185	1.4378	1.59184	1.35492	1.16798	1.0448	1.07628	1.07941	1.11319	1.42756	1.53749	1.59175
	Tran	4.6143	4.16796	4.55951	3.8883	3.24796	2.6629	2.59942	2.74422	3.10056	3.79852	4.36403	4.61213
	Total	15.1983	14.0299	15.6834	14.5623	14.1341	12.8083	13.002	13.2877	13.5967	14.6889	15.4064	15.7065
CO2	Pow	43.9012	39.6558	43.9014	42.4854	43.9005	42.4855	43.9008	43.9006	42.4852	43.9009	42.4858	43.9017
	Ind	14.6824	13.6947	15.4251	15.122	15.4881	14.5751	14.9355	15.1422	14.9519	15.1433	15.1298	15.2531
	Resi	6.61365	5.97338	6.61305	5.2639	4.36126	3.81938	3.93571	3.94467	4.13633	5.79895	6.38346	6.61263
	Tran	5.98763	5.4098	5.98763	5.79496	5.98761	5.79494	5.9876	5.9876	5.79495	5.98763	5.79496	5.98763
	Total	71.1849	64.7337	71.9272	68.6662	69.7375	66.6749	68.7597	68.975	67.3684	70.8308	69.7941	71.7551
